# Supplementary figures and images for: The Effect of High Loaded Multiwall Carbon Nanotubes in Natural Rubber and Their Nonlinear Material Constants
Source: Hindawi journal article supplement (doi:10.1155/2017/6193961), 2017-01-01

# Graphical Abstract

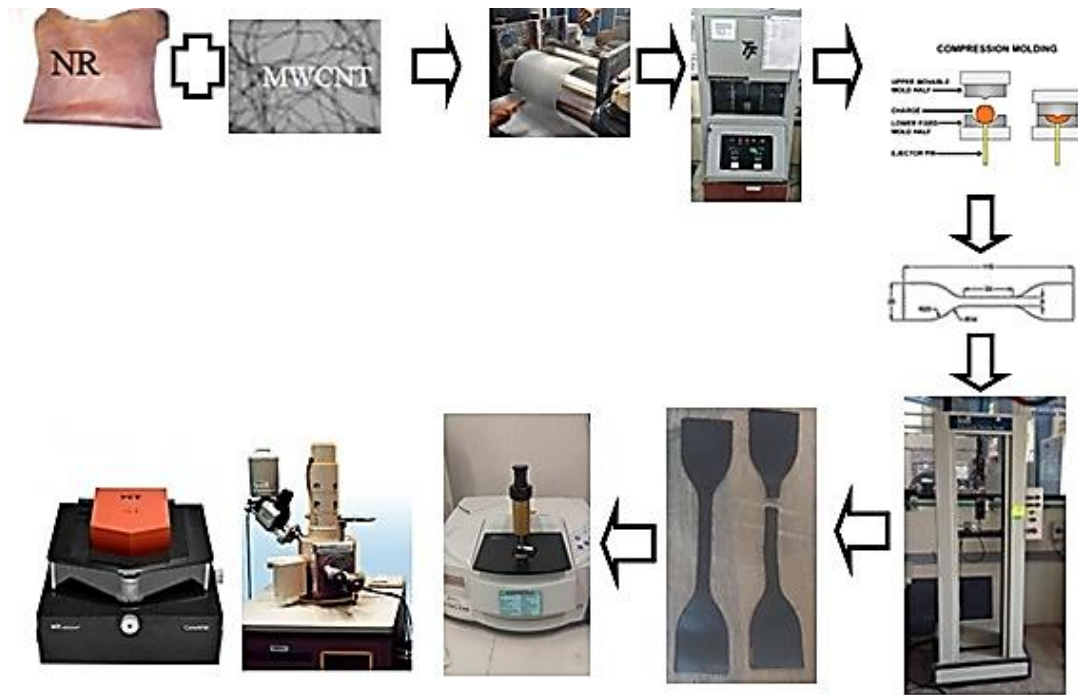

Supplement: f1 [file 6193961.f1.pdf]
